# Supplementary material
Source: Springer Nature journal article supplement (https://www.springermedizin.de/resource/supplementary/12891_2008_510_MOESM5_ESM.pdf/9511202)
Supplement: MOESM5 [file 9511202]

Title/abstract of potentially relevant studies identified and screened (n=33)

Full text studies retrieved and reviewed (n=5)

Studies included in final review (n=4)

Titles excluded (n=28)

Reasons:

pre-operative splinting (n=2)

Incomplete study (n=1)

Not research (n=14)

Non-English language (n=5)

Not splinting (n=6)

Full studies excluded (n=1)

Reasons:

post-op splinting less than 6 weeks (n=1) *Jain et al 1988*
